# Supplementary material
Source: publisher figshare collection journal article supplement (https://acs.figshare.com/ndownloader/files/5677719)
Supplement: Supplementary file 1 [file 5677719]

 
data_tl28fmm 
 
_audit_creation_method            SHELXL-97 
_chemical_name_systematic 
; 
 'diketopiperazine + 5-chlorosalicylic acid'
; 
_chemical_name_common             ? 
_chemical_melting_point           ? 
_chemical_formula_moiety          ? 
_chemical_formula_sum    'C18 H16 Cl2 N2 O8' 
_chemical_formula_weight          459.22 
 
loop_ 
 _atom_type_symbol 
 _atom_type_description 
 _atom_type_scat_dispersion_real 
 _atom_type_scat_dispersion_imag 
 _atom_type_scat_source 
 'C'  'C'   0.0033   0.0016 
 'International Tables Vol C Tables 4.2.6.8 and 6.1.1.4' 
 'H'  'H'   0.0000   0.0000 
 'International Tables Vol C Tables 4.2.6.8 and 6.1.1.4' 
 'N'  'N'   0.0061   0.0033 
 'International Tables Vol C Tables 4.2.6.8 and 6.1.1.4' 
 'O'  'O'   0.0106   0.0060 
 'International Tables Vol C Tables 4.2.6.8 and 6.1.1.4' 
 'Cl'  'Cl'   0.1484   0.1585 
 'International Tables Vol C Tables 4.2.6.8 and 6.1.1.4' 
 
_symmetry_cell_setting            monoclinic
_symmetry_space_group_name_H-M    P2(1)/c
 
loop_ 
 _symmetry_equiv_pos_as_xyz 
 'x, y, z' 
 '-x+1/2, y+1/2, -z+1/2' 
 '-x, -y, -z' 
 'x-1/2, -y-1/2, z-1/2' 
 
_cell_length_a                    11.816(2) 
_cell_length_b                    5.4552(10) 
_cell_length_c                    14.331(3) 
_cell_angle_alpha                 90.00 
_cell_angle_beta                  98.255(2) 
_cell_angle_gamma                 90.00 
_cell_volume                      914.2(3) 
_cell_formula_units_Z             2 
_cell_measurement_temperature     90(2) 
_cell_measurement_reflns_used     ? 
_cell_measurement_theta_min       ? 
_cell_measurement_theta_max       ? 
 
_exptl_crystal_description        stick
_exptl_crystal_colour             colorless
_exptl_crystal_size_max           0.20 
_exptl_crystal_size_mid           0.16 
_exptl_crystal_size_min           0.16 
_exptl_crystal_density_meas       ? 
_exptl_crystal_density_diffrn     1.668 
_exptl_crystal_density_method     'not measured' 
_exptl_crystal_F_000              472 
_exptl_absorpt_coefficient_mu     0.410 
_exptl_absorpt_correction_type    none 
_exptl_absorpt_correction_T_min   0.9226 
_exptl_absorpt_correction_T_max   0.9374 
_exptl_absorpt_process_details    ? 
 
_exptl_special_details 
; 
 ? 
; 
 
_diffrn_ambient_temperature       90(2) 
_diffrn_radiation_wavelength      0.71073 
_diffrn_radiation_type            MoK\a 
_diffrn_radiation_source          'normal-focus sealed tube' 
_diffrn_radiation_monochromator   graphite 
_diffrn_measurement_device_type   'Bruker SMART 1000'  
_diffrn_measurement_method        \w  
_diffrn_detector_area_resol_mean  ? 
_diffrn_standards_number          '50 frames remeasured' 
_diffrn_standards_interval_count  ? 
_diffrn_standards_interval_time   ? 
_diffrn_standards_decay_%         <0.1
_diffrn_reflns_number             8110 
_diffrn_reflns_av_R_equivalents   0.0466 
_diffrn_reflns_av_sigmaI/netI     0.0590 
_diffrn_reflns_limit_h_min        -17 
_diffrn_reflns_limit_h_max        16 
_diffrn_reflns_limit_k_min        -6 
_diffrn_reflns_limit_k_max        8 
_diffrn_reflns_limit_l_min        -20 
_diffrn_reflns_limit_l_max        20 
_diffrn_reflns_theta_min          2.09 
_diffrn_reflns_theta_max          31.49 
_reflns_number_total              2859 
_reflns_number_gt                 2035 
_reflns_threshold_expression      >2sigma(I) 
 
_computing_data_collection        'Bruker SMART' 
_computing_cell_refinement        'Bruker SAINT' 
_computing_data_reduction         'Bruker SAINT' 
_computing_structure_solution     'SHELXS-97 (Sheldrick, 1990)' 
_computing_structure_refinement   'SHELXL-97 (Sheldrick, 1997)' 
_computing_molecular_graphics     'SHELXTL 5.03, XP (Sheldrick, 1994)' 
_computing_publication_material   'SHELXL-97 (Sheldrick, 1997)' 
 
_refine_special_details 
; 
 Refinement of F^2^ against ALL reflections.  The weighted R-factor wR and 
 goodness of fit S are based on F^2^, conventional R-factors R are based 
 on F, with F set to zero for negative F^2^. The threshold expression of 
 F^2^ > 2sigma(F^2^) is used only for calculating R-factors(gt) etc. and is 
 not relevant to the choice of reflections for refinement.  R-factors based 
 on F^2^ are statistically about twice as large as those based on F, and R- 
 factors based on ALL data will be even larger. 
; 
 
_refine_ls_structure_factor_coef  Fsqd  
_refine_ls_matrix_type            full 
_refine_ls_weighting_scheme       calc  
_refine_ls_weighting_details 
 'calc w=1/[\s^2^(Fo^2^)+(0.0444P)^2^+0.0000P] where P=(Fo^2^+2Fc^2^)/3' 
_atom_sites_solution_primary      direct 
_atom_sites_solution_secondary    difmap 
_atom_sites_solution_hydrogens    geom 
_refine_ls_hydrogen_treatment     mixed 
_refine_ls_extinction_method      none 
_refine_ls_extinction_coef        ? 
_refine_ls_number_reflns          2859 
_refine_ls_number_parameters      168 
_refine_ls_number_restraints      0 
_refine_ls_R_factor_all           0.0601 
_refine_ls_R_factor_gt            0.0382 
_refine_ls_wR_factor_ref          0.0903 
_refine_ls_wR_factor_gt           0.0830 
_refine_ls_goodness_of_fit_ref    0.924 
_refine_ls_restrained_S_all       0.924 
_refine_ls_shift/su_max           0.001 
_refine_ls_shift/su_mean          0.000 
 
loop_ 
 _atom_site_label 
 _atom_site_type_symbol 
 _atom_site_fract_x 
 _atom_site_fract_y 
 _atom_site_fract_z 
 _atom_site_U_iso_or_equiv 
 _atom_site_adp_type 
 _atom_site_occupancy 
 _atom_site_symmetry_multiplicity 
 _atom_site_calc_flag 
 _atom_site_refinement_flags 
 _atom_site_disorder_assembly 
 _atom_site_disorder_group 
Cl1 Cl 0.58545(4) 0.15868(7) 0.15594(3) 0.01691(11) Uani 1 1 d . . . 
N1 N 0.94098(12) 0.2864(2) -0.02471(9) 0.0140(3) Uani 1 1 d . . . 
H1N H 0.8992(17) 0.157(3) -0.0402(13) 0.018(5) Uiso 1 1 d . . . 
C1 C 0.97532(13) 0.3177(3) 0.06652(11) 0.0133(3) Uani 1 1 d . . . 
O1 O 0.95707(10) 0.1603(2) 0.12594(8) 0.0163(2) Uani 1 1 d . . . 
C2 C 0.96353(14) 0.4496(3) -0.09989(11) 0.0138(3) Uani 1 1 d . . . 
H2B H 0.8954(14) 0.490(3) -0.1405(11) 0.006(4) Uiso 1 1 d . . . 
H2A H 1.0118(16) 0.368(3) -0.1379(13) 0.014(5) Uiso 1 1 d . . . 
C3 C 0.66084(13) 0.5113(3) -0.07250(10) 0.0128(3) Uani 1 1 d . . . 
C4 C 0.72828(14) 0.7075(3) -0.03254(11) 0.0134(3) Uani 1 1 d . . . 
O4 O 0.77248(10) 0.8809(2) -0.08585(9) 0.0163(3) Uani 1 1 d . . . 
H4 H 0.752(2) 0.849(4) -0.1422(17) 0.045(7) Uiso 1 1 d . . . 
C5 C 0.75164(14) 0.7311(3) 0.06517(11) 0.0152(3) Uani 1 1 d . . . 
H5 H 0.7946(16) 0.859(3) 0.0918(12) 0.010(4) Uiso 1 1 d . . . 
C6 C 0.70859(14) 0.5626(3) 0.12285(11) 0.0155(3) Uani 1 1 d . . . 
H6 H 0.7248(16) 0.584(3) 0.1922(13) 0.017(5) Uiso 1 1 d . . . 
C7 C 0.64239(14) 0.3680(3) 0.08306(11) 0.0141(3) Uani 1 1 d . . . 
C8 C 0.61786(14) 0.3413(3) -0.01346(11) 0.0135(3) Uani 1 1 d . . . 
H8 H 0.5710(16) 0.212(3) -0.0412(12) 0.015(5) Uiso 1 1 d . . . 
C9 C 0.63180(14) 0.4906(3) -0.17635(11) 0.0137(3) Uani 1 1 d . . . 
O9A O 0.67273(10) 0.6279(2) -0.23109(8) 0.0166(2) Uani 1 1 d . . . 
O9B O 0.55753(10) 0.3165(2) -0.20370(8) 0.0169(3) Uani 1 1 d . . . 
H9 H 0.530(2) 0.331(4) -0.2668(19) 0.053(8) Uiso 1 1 d . . . 
 
loop_ 
 _atom_site_aniso_label 
 _atom_site_aniso_U_11 
 _atom_site_aniso_U_22 
 _atom_site_aniso_U_33 
 _atom_site_aniso_U_23 
 _atom_site_aniso_U_13 
 _atom_site_aniso_U_12 
Cl1 0.0198(2) 0.0176(2) 0.01373(18) 0.00328(15) 0.00384(14) 0.00088(16) 
N1 0.0176(7) 0.0117(7) 0.0122(6) -0.0007(5) 0.0008(5) -0.0018(5) 
C1 0.0119(7) 0.0133(7) 0.0146(7) -0.0007(6) 0.0016(6) 0.0019(6) 
O1 0.0188(6) 0.0161(6) 0.0133(5) 0.0034(4) 0.0004(5) -0.0021(5) 
C2 0.0147(8) 0.0157(8) 0.0106(7) -0.0002(6) 0.0002(6) -0.0008(6) 
C3 0.0128(7) 0.0138(8) 0.0118(7) -0.0001(6) 0.0012(6) 0.0010(6) 
C4 0.0118(8) 0.0138(8) 0.0150(7) 0.0006(6) 0.0034(6) 0.0010(6) 
O4 0.0188(6) 0.0168(6) 0.0133(6) -0.0004(4) 0.0026(5) -0.0036(5) 
C5 0.0147(8) 0.0156(8) 0.0144(8) -0.0029(6) -0.0006(6) -0.0009(6) 
C6 0.0156(8) 0.0189(8) 0.0115(7) -0.0016(6) 0.0000(6) 0.0022(6) 
C7 0.0144(7) 0.0149(8) 0.0135(7) 0.0024(6) 0.0042(6) 0.0017(6) 
C8 0.0127(8) 0.0133(7) 0.0141(7) -0.0012(6) 0.0008(6) 0.0011(6) 
C9 0.0134(7) 0.0132(7) 0.0146(7) -0.0016(6) 0.0024(6) 0.0015(6) 
O9A 0.0191(6) 0.0173(6) 0.0139(5) 0.0015(4) 0.0042(5) -0.0008(5) 
O9B 0.0208(6) 0.0171(6) 0.0118(5) -0.0006(4) -0.0005(5) -0.0045(5) 
 
_geom_special_details 
; 
 All esds (except the esd in the dihedral angle between two l.s. planes) 
 are estimated using the full covariance matrix.  The cell esds are taken 
 into account individually in the estimation of esds in distances, angles 
 and torsion angles; correlations between esds in cell parameters are only 
 used when they are defined by crystal symmetry.  An approximate (isotropic) 
 treatment of cell esds is used for estimating esds involving l.s. planes. 
; 
 
loop_ 
 _geom_bond_atom_site_label_1 
 _geom_bond_atom_site_label_2 
 _geom_bond_distance 
 _geom_bond_site_symmetry_2 
 _geom_bond_publ_flag 
Cl1 C7 1.7463(16) . ? 
N1 C1 1.323(2) . ? 
N1 C2 1.452(2) . ? 
N1 H1N 0.873(19) . ? 
C1 O1 1.2495(18) . ? 
C1 C2 1.504(2) 3_765 ? 
C2 C1 1.504(2) 3_765 ? 
C2 H2B 0.949(16) . ? 
C2 H2A 0.953(18) . ? 
C3 C8 1.399(2) . ? 
C3 C4 1.406(2) . ? 
C3 C9 1.483(2) . ? 
C4 O4 1.3658(18) . ? 
C4 C5 1.394(2) . ? 
O4 H4 0.83(2) . ? 
C5 C6 1.381(2) . ? 
C5 H5 0.915(18) . ? 
C6 C7 1.391(2) . ? 
C6 H6 0.991(19) . ? 
C7 C8 1.380(2) . ? 
C8 H8 0.947(19) . ? 
C9 O9A 1.2327(18) . ? 
C9 O9B 1.3141(19) . ? 
O9B H9 0.92(3) . ? 
 
loop_ 
 _geom_angle_atom_site_label_1 
 _geom_angle_atom_site_label_2 
 _geom_angle_atom_site_label_3 
 _geom_angle 
 _geom_angle_site_symmetry_1 
 _geom_angle_site_symmetry_3 
 _geom_angle_publ_flag 
C1 N1 C2 126.26(14) . . ? 
C1 N1 H1N 116.0(12) . . ? 
C2 N1 H1N 117.7(12) . . ? 
O1 C1 N1 121.77(15) . . ? 
O1 C1 C2 119.01(14) . 3_765 ? 
N1 C1 C2 119.22(14) . 3_765 ? 
N1 C2 C1 114.36(13) . 3_765 ? 
N1 C2 H2B 111.4(10) . . ? 
C1 C2 H2B 109.1(10) 3_765 . ? 
N1 C2 H2A 109.1(11) . . ? 
C1 C2 H2A 106.0(11) 3_765 . ? 
H2B C2 H2A 106.4(14) . . ? 
C8 C3 C4 119.47(14) . . ? 
C8 C3 C9 120.32(14) . . ? 
C4 C3 C9 120.17(14) . . ? 
O4 C4 C5 117.49(14) . . ? 
O4 C4 C3 122.63(14) . . ? 
C5 C4 C3 119.89(14) . . ? 
C4 O4 H4 108.5(16) . . ? 
C6 C5 C4 120.20(15) . . ? 
C6 C5 H5 119.3(11) . . ? 
C4 C5 H5 120.5(11) . . ? 
C5 C6 C7 119.74(15) . . ? 
C5 C6 H6 119.1(11) . . ? 
C7 C6 H6 121.1(11) . . ? 
C8 C7 C6 121.10(15) . . ? 
C8 C7 Cl1 119.13(13) . . ? 
C6 C7 Cl1 119.74(12) . . ? 
C7 C8 C3 119.60(15) . . ? 
C7 C8 H8 121.7(11) . . ? 
C3 C8 H8 118.7(11) . . ? 
O9A C9 O9B 123.76(15) . . ? 
O9A C9 C3 122.48(14) . . ? 
O9B C9 C3 113.75(14) . . ? 
C9 O9B H9 111.1(15) . . ? 
 
_diffrn_measured_fraction_theta_max    0.942 
_diffrn_reflns_theta_full              31.49 
_diffrn_measured_fraction_theta_full   0.942 
_refine_diff_density_max    0.425 
_refine_diff_density_min   -0.263 
_refine_diff_density_rms    0.072 
